# Supplementary material for: Identification of a Clade-Specific HLA-C*03:02-Restricted Epitope GY9 Derived from the HIV-1 p17 Matrix Protein
Source: Preprints.org preprint supplement (doi:10.20944/preprints202310.0441.v1), 2023-10-08
Supplement: Supplementary file 3 [file supplementary]

**Figure S1. Model building and validation**. (A) Parameters of 5w6a.2.A the template selected for model building. (B) Model-template alignment. The predicted model is colored by a QMEANDisCo score similar to Figure 1C. (C) 3D structure of the model colored by local residue confidence score, red being low and blue very high score estimated with the QMEANDisCo scoring function (range 0–1). An oval ring shows the peptide binding groove. (D) QMEAN z-scores of the model. All five scores are a comparison of the model with the expected experimentally determined structures of similar size.

(E) Plot of the normalized QMEAN scores of the reference set used in constructing the protein model of C*0302. (F) Ramachandran plot shows the values of dihedral angles Φ and Ψ of each residue. Red indicates favored region, brown shows the allowed region, while yellow and light yellow are outlier regions. No residue lies outside of the favored region. (G) ProSA – Protein structural analysis plot of the overall 3D quality z-score of the model compared to X-ray and NMR solved structures.

Abbreviations: QMEAN, Qualitative Model Energy Analysis; QMEANDisCo, Qualitative Model Energy Analysis Distance constraints.

**Figure S2. Modeling validation.** (A) ERRAT score for the selected model. Yellow color shows the error region between 95 and 99%, Red color shows the misfolded region, and white color shows the lower error rate of protein folding. (B) Verify-3D plot showed that 99.63% of the residues have averaged a 3D-1D score of ≥ 0.2. (C) ProTSAV score of 0.54 and root-mean-square distance (RMSD) within the range of 2-5Å, suggesting moderate accuracy of the model.

**Figure S3. The molecular docking representation and RMSD analysis of C*0302 with docked epitopes GL9 (A, B and G), VY8 (C&D), WF9 (E) and KN9 (F and H)**. (G) and (H) show the RMSD plot of GL9 and KN9 showing the lack of stability.

**Table S1. List of peptides classified as strong or weak binders**

| **Peptide** | **Protein** | **Position** | **Subtype** | **Score_EL** | **%Rank_EL** | **Score_BA** | **%Rank_BA** | **Aff(nM)** | **Shared with MotifScan** | **Binding Level** |
| --- | --- | --- | --- | --- | --- | --- | --- | --- | --- | --- |
| RAVGIGAVF | Env | 493/4 | A1 & C | 0.882943 | 0.029 | 0.830774 | 0.023 | 6.24 | Y | SB |
| RAVGIGAVF | Env | 494 | C | 0.882943 | 0.029 | 0.830774 | 0.023 | 6.24 |  | SB |
| ISNYTHIIY | Env | 617 | A1 | 0.761367 | 0.089 | 0.757922 | 0.072 | 13.73 |  | SB |
| LAWDDLRSL | Env | 737 | A1 & C | 0.742696 | 0.098 | 0.694673 | 0.166 | 27.21 |  | SB |
| RAIEAQQHL | Env | 539 | A1 | 0.719846 | 0.124 | 0.621234 | 0.337 | 60.23 |  | SB |
| FSYHRLRDF | Env | 748 | A1 & C | 0.715692 | 0.127 | 0.785577 | 0.048 | 10.18 |  | SB |
| VSFEPIPIHY | Env | 203 | A1 | 0.572694 | 0.24 | 0.513237 | 0.791 | 193.77 |  | SB |
| HSFNCGGEF | Env | 367 | A1 | 0.531917 | 0.286 | 0.765019 | 0.064 | 12.71 |  | SB |
| FCASDAKAY | Env | 52 | A1 & C | 0.47309 | 0.366 | 0.582521 | 0.478 | 91.56 |  | SB |
| NAKTIIVQL | Env | 275 | A1 | 0.451979 | 0.395 | 0.355564 | 2.382 | 1067.05 |  | SB |
| SFEPIPIHY | Env | 204 | A1 | 0.436763 | 0.418 | 0.251438 | 4.882 | 3292.08 |  | SB |
| SAAENLWVTVY | Env | 28 | A1 | 0.398212 | 0.478 | 0.507083 | 0.826 | 207.11 | y | SB |
| RAIEAQQHM | Env | 529 | C | 0.83873 | 0.05 | 0.72826 | 0.116 | 18.92 |  | SB |
| VSFDPIPIHY | Env | 196 | C | 0.67235 | 0.159 | 0.526122 | 0.725 | 168.55 |  | SB |
| TSKLFNSTY | Env | 373 | C | 0.660196 | 0.172 | 0.607834 | 0.378 | 69.63 |  | SB |
| SFDPIPIHY | Env | 197 | C | 0.653036 | 0.178 | 0.296926 | 3.526 | 2012.44 |  | SB |
| YSPLSFQTL | Env | 684 | C | 0.523339 | 0.297 | 0.592497 | 0.435 | 82.19 |  | SB |
| TAVPWNSSW | Env | 578 | C | 0.498843 | 0.33 | 0.553949 | 0.6 | 124.73 |  | SB |
| ISNYTDTIY | Env | 607 | C | 0.49404 | 0.337 | 0.680644 | 0.192 | 31.67 |  | SB |
| HSFNCRGEF | Env | 360 | C | 0.447834 | 0.4 | 0.722646 | 0.124 | 20.1 |  | SB |
| NATNATNTM | Env | 132 | C | 0.434379 | 0.422 | 0.622937 | 0.332 | 59.13 |  | SB |
| YTDTIYRLL | Env | 610 | C | 0.428991 | 0.43 | 0.517677 | 0.768 | 184.68 |  | SB |
| SIRIGPGQTF | Env | 294 | C | 0.395192 | 0.483 | 0.43147 | 1.402 | 469.36 |  | SB |
| VGNLWVTVY | Env | 30 | C | 0.386815 | 0.496 | 0.521671 | 0.748 | 176.87 |  | SB |
| RALGPGATL | Gag | 335 | A1 & C | 0.769621 | 0.085 | 0.698606 | 0.157 | 26.08 |  | SB |
| FSPEVIPMF | Gag | 164 | A1 & C | 0.601813 | 0.216 | 0.573088 | 0.519 | 101.4 |  | SB |
| YVDRFFKTL | Gag | 296 | A1 & C | 0.512706 | 0.311 | 0.532807 | 0.692 | 156.79 |  | SB |
| NSSKVSQNY | Gag | 124 | A1 | 0.463877 | 0.378 | 0.471721 | 1.06 | 303.65 |  | SB |
| FALNPSLL | Gag | 44 | A1 | 0.414924 | 0.452 | 0.532447 | 0.694 | 157.4 |  | SB |
| IALEMHPEF | Nef | 195 | A | 0.911434 | 0.016 | 0.779453 | 0.051 | 10.87 |  | SB |
| YTPGPGTRF | Nef | 128 | A | 0.731763 | 0.109 | 0.550209 | 0.616 | 129.88 |  | SB |
| MARELHPEY | Nef | 195 | C | 0.927552 | 0.013 | 0.802619 | 0.041 | 8.46 |  | SB |
| YTPGPGVRY | Nef | 128 | C | 0.799714 | 0.067 | 0.562132 | 0.565 | 114.16 |  | SB |
| AAFDLSFFL | Nef | 84 | C | 0.447516 | 0.401 | 0.601996 | 0.396 | 74.17 |  | SB |
| QVPLRPMTY | Nef | 74 | C | 0.422209 | 0.441 | 0.346374 | 2.524 | 1178.61 |  | SB |
| KAAFDLSFF | Nef | 83 | C | 0.401476 | 0.473 | 0.634637 | 0.297 | 52.1 |  | SB |
| FSVPLDESF | Pol | 271 | A1 | 0.801681 | 0.066 | 0.774497 | 0.055 | 11.47 |  | SB |
| VAVHVASGY | Pol | 790 | A1 & C | 0.734988 | 0.105 | 0.733173 | 0.109 | 17.94 |  | SB |
| FSFPQITL | Pol | 54 | A1 | 0.709584 | 0.131 | 0.611932 | 0.366 | 66.61 |  | SB |
| FSFPQITLW | Pol | 54 | A1 | 0.611108 | 0.209 | 0.624421 | 0.328 | 58.19 |  | SB |
| KAQEEHERY | Pol | 722 | A1 | 0.567706 | 0.244 | 0.422455 | 1.503 | 517.45 |  | SB |
| TVLDVGDAY | Pol | 262 | A1 | 0.508985 | 0.316 | 0.536598 | 0.676 | 150.49 |  | SB |
| WANIQQEF | Pol | 847 | A1 | 0.456545 | 0.388 | 0.488867 | 0.943 | 252.23 |  | SB |
| KALTDIVTL | Pol | 442 | A1 | 0.434042 | 0.422 | 0.48895 | 0.942 | 252 |  | SB |
| IQQEFGIPY | Pol | 850 | A1 & C | 0.422751 | 0.44 | 0.561249 | 0.569 | 115.26 |  | SB |
| IVTDSQYAL | Pol | 650 | A1 & C | 0.422403 | 0.44 | 0.525228 | 0.73 | 170.19 |  | SB |
| VIWGKTPKF | Pol | 536 | A1 & C | 0.417946 | 0.447 | 0.396999 | 1.785 | 681.53 |  | SB |
| YAGIKVKQL | Pol | 426 | A1 | 0.416351 | 0.45 | 0.433945 | 1.379 | 456.96 |  | SB |
| FQQGEARKF | Pol | 8 | A1 | 0.399945 | 0.476 | 0.413004 | 1.597 | 573.16 |  | SB |
| IIRDYGKQM | Pol | 982 | A1 | 0.385613 | 0.498 | 0.447044 | 1.256 | 396.57 |  | SB |
| AQNPEIVIY | Pol | 324 | C | 0.633581 | 0.192 | 0.405893 | 1.675 | 619 |  | SB |
| KAQEEHEKY | Pol | 718 | C | 0.629062 | 0.195 | 0.416035 | 1.567 | 554.67 |  | SB |
| LAFPQGEAREF | Pol | 6 | C | 0.503965 | 0.323 | 0.55705 | 0.587 | 120.62 |  | SB |
| IAMESIVIW | Pol | 526 | C | 0.453247 | 0.393 | 0.584738 | 0.469 | 89.39 |  | SB |
| FSVPLDEGF | Pol | 267 | C | 0.420922 | 0.443 | 0.643744 | 0.274 | 47.21 |  | SB |
| IIKDYGKQM | Pol | 978 | C | 0.411548 | 0.457 | 0.411849 | 1.609 | 580.37 |  | SB |
| RAQNPEIVIY | Pol | 323 | C | 0.395124 | 0.483 | 0.440535 | 1.319 | 425.51 |  | SB |
| SAEPVPLQL | Rev | 67 | A1 | 0.826617 | 0.055 | 0.504657 | 0.841 | 212.62 |  | SB |
| VSVESPVIL | Rev | 109 | A1 | 0.560202 | 0.25 | 0.582496 | 0.478 | 91.59 |  | SB |
| QTKGLGISY | Tat | 39 | C | 0.5222 | 0.298 | 0.410085 | 1.629 | 591.55 |  | SB |
| VSSEVHIPL | Vif | 51 | A1 & C | 0.527779 | 0.291 | 0.697677 | 0.159 | 26.34 |  | SB |
| QVVSPRCEY | Vif | 127 | A1 | 0.517982 | 0.304 | 0.510408 | 0.806 | 199.79 |  | SB |
| FPRPWLHSL | Vpr | 34 | C | 0.39766 | 0.479 | 0.453593 | 1.193 | 369.45 |  | SB |
| SIRIGPGQAF | Env | 301 | A1 | 0.382582 | 0.504 | 0.475587 | 1.035 | 291.21 |  | WB |
| IAARTVEL | Env | 759 | A1 | 0.366525 | 0.54 | 0.401091 | 1.732 | 652.01 |  | WB |
| KSIRIGPGQAF | Env | 300 | A1 | 0.355927 | 0.564 | 0.431358 | 1.404 | 469.93 |  | WB |
| VAKQLRKYF | Env | 339 | A1 | 0.353734 | 0.569 | 0.399043 | 1.759 | 666.62 | Y | WB |
| VSFEPIPIH | Env | 203 | A1 | 0.307562 | 0.672 | 0.387403 | 1.905 | 756.09 |  | WB |
| KVAKQLRKY | Env | 338 | A1 | 0.294791 | 0.701 | 0.309951 | 3.231 | 1747.91 |  | WB |
| IAARTVELL | Env | 759 | A1 | 0.291271 | 0.711 | 0.512399 | 0.795 | 195.53 |  | WB |
| LIAARTVEL | Env | 758 | A1 | 0.284241 | 0.733 | 0.528858 | 0.711 | 163.64 |  | WB |
| YAPPIQGVI | Env | 418 | A1 | 0.270802 | 0.774 | 0.515124 | 0.781 | 189.85 |  | WB |
| LALDKWANL | Env | 643 | A1 | 0.267282 | 0.785 | 0.491717 | 0.922 | 244.57 |  | WB |
| KRAVGIGAVF | Env | 492 | A1 & C | 0.250841 | 0.84 | 0.56029 | 0.573 | 116.46 |  | WB |
| FLGAAGSTM | Env | 504 | A1 & C | 0.248595 | 0.847 | 0.637507 | 0.29 | 50.51 |  | WB |
| HSSLKGLRL | Env | 769 | A1 | 0.235975 | 0.891 | 0.385263 | 1.937 | 773.8 |  | WB |
| TQACPKVSF | Env | 197 | A1 & C | 0.230732 | 0.911 | 0.381144 | 1.998 | 809.07 |  | WB |
| TVYYGVPVW | Env | 36 | A1 & C | 0.230436 | 0.912 | 0.448681 | 1.24 | 389.61 |  | WB |
| LTVQARQLL | Env | 519 | A1 & C | 0.229157 | 0.918 | 0.483657 | 0.98 | 266.86 |  | WB |
| CSFNMTTEL | Env | 150 | A1 | 0.227933 | 0.923 | 0.658451 | 0.238 | 40.27 |  | WB |
| GTMKNTITL | Env | 391 | A1 | 0.223283 | 0.943 | 0.456227 | 1.173 | 359.06 |  | WB |
| IRIGPGQAF | Env | 302 | A1 | 0.221586 | 0.95 | 0.394757 | 1.813 | 698.26 |  | WB |
| RIGPGQAFY | Env | 303 | A1 | 0.22056 | 0.954 | 0.363576 | 2.262 | 978.45 |  | WB |
| YFKNKTIIF | Env | 346 | A1 | 0.215331 | 0.976 | 0.371941 | 2.136 | 893.78 |  | WB |
| RSIRLVSGF | Env | 726 | A1 & C | 0.203926 | 1.032 | 0.527622 | 0.717 | 165.84 |  | WB |
| LTVWGIKQL | Env | 550 | A1 & C | 0.187713 | 1.125 | 0.408074 | 1.651 | 604.56 |  | WB |
| RLVSGFLAL | Env | 729 | A1 & C | 0.180556 | 1.172 | 0.509643 | 0.811 | 201.45 |  | WB |
| YSPLSFQTH | Env | 694 | A1 | 0.179217 | 1.18 | 0.403213 | 1.705 | 637.21 |  | WB |
| EAQQHLLKL | Env | 542 | A1 | 0.178821 | 1.183 | 0.262888 | 4.51 | 2908.49 |  | WB |
| YCAPAGFAI | Env | 212 | A1 | 0.17839 | 1.186 | 0.513188 | 0.791 | 193.87 |  | WB |
| FTNSSGGDL | Env | 354 | A1 | 0.177427 | 1.192 | 0.581559 | 0.482 | 92.52 |  | WB |
| VINRVRQGY | Env | 686 | A1 | 0.173406 | 1.219 | 0.333906 | 2.752 | 1348.83 |  | WB |
| GAASITLTV | Env | 513 | A1 & C | 0.153775 | 1.361 | 0.442535 | 1.301 | 416.4 |  | WB |
| WQRAGQAMY | Env | 410 | A1 | 0.141279 | 1.472 | 0.44034 | 1.321 | 426.41 |  | WB |
| RQGYSPLSF | Env | 691 | A1 & C | 0.13327 | 1.546 | 0.335467 | 2.723 | 1326.24 |  | WB |
| IVQQQSNLL | Env | 530 | A1 & C | 0.127759 | 1.598 | 0.308892 | 3.255 | 1768.05 |  | WB |
| RIGPGQAF | Env | 303 | A1 | 0.127464 | 1.601 | 0.261377 | 4.559 | 2956.43 |  | WB |
| RVIEIGQRI | Env | 817 | A1 | 0.126817 | 1.608 | 0.325536 | 2.905 | 1476.68 |  | WB |
| SAAENLWVTVYY | Env | 28 | A1 | 0.123482 | 1.643 | 0.43549 | 1.365 | 449.38 |  | WB |
| VTNNTTNTH | Env | 135 | A1 | 0.122096 | 1.658 | 0.32029 | 3 | 1562.92 |  | WB |
| HLENVTEEF | Env | 84 | A1 | 0.119104 | 1.69 | 0.281899 | 3.926 | 2367.75 |  | WB |
| RVRQGYSPL | Env | 689 | A1 & C | 0.118692 | 1.694 | 0.498367 | 0.879 | 227.59 |  | WB |
| KVSFEPIPIHY | Env | 202 | A1 | 0.116024 | 1.728 | 0.201961 | 7.138 | 5622.91 |  | WB |
| IISLWDQSL | Env | 107 | A1 & C | 0.110283 | 1.804 | 0.425397 | 1.471 | 501.24 |  | WB |
| QGYSPLSF | Env | 692 | A1 & C | 0.105649 | 1.866 | 0.22955 | 5.738 | 4171.78 |  | WB |
| VAKQLRKY | Env | 339 | A1 | 0.105324 | 1.87 | 0.160003 | 10.071 | 8853.62 | Y | WB |
| HSFNCGGEFF | Env | 367 | A1 | 0.104954 | 1.875 | 0.508729 | 0.817 | 203.45 |  | WB |
| KQKVYSLFY | Env | 162 | A1 | 0.104182 | 1.885 | 0.31117 | 3.204 | 1725.01 |  | WB |
| QACPKVSF | Env | 198 | A1 & C | 0.101887 | 1.916 | 0.172265 | 9.063 | 7753.57 | Y | WB |
| QMHTDIISL | Env | 102 | A1 | 0.099229 | 1.953 | 0.342537 | 2.594 | 1228.57 |  | WB |
| CASDAKAY | Env | 53 | A1 & C | 0.09624 | 1.995 | 0.308427 | 3.265 | 1776.97 | Y | WB |
| MIVGGLIGL | Env | 669 | A1 & C | 0.09606 | 1.998 | 0.437634 | 1.346 | 439.08 |  | WB |
| VSFDPIPIH | Env | 196 | C | 0.34104 | 0.598 | 0.393241 | 1.832 | 709.81 |  | WB |
| CSFNITTEL | Env | 146 | C | 0.337204 | 0.607 | 0.663407 | 0.227 | 38.16 |  | WB |
| KSIRIGPGQTF | Env | 293 | C | 0.335109 | 0.611 | 0.377459 | 2.053 | 841.98 |  | WB |
| IVNRVRQGY | Env | 676 | C | 0.319602 | 0.646 | 0.423979 | 1.486 | 508.99 |  | WB |
| NAKTIIVHL | Env | 268 | C | 0.318164 | 0.649 | 0.323603 | 2.94 | 1507.89 |  | WB |
| RIGPGQTFY | Env | 296 | C | 0.293707 | 0.704 | 0.347757 | 2.499 | 1161.1 |  | WB |
| IAARAVEL | Env | 749 | C | 0.281786 | 0.74 | 0.358909 | 2.332 | 1029.12 |  | WB |
| EAQQHMLQL | Env | 532 | C | 0.267757 | 0.783 | 0.335862 | 2.716 | 1320.58 |  | WB |
| LALDSWKNL | Env | 633 | C | 0.263671 | 0.796 | 0.464013 | 1.113 | 330.06 |  | WB |
| IRIGPGQTF | Env | 295 | C | 0.253702 | 0.83 | 0.361972 | 2.286 | 995.58 |  | WB |
| NSTNSTITL | Env | 382 | C | 0.25187 | 0.836 | 0.475012 | 1.039 | 293.02 |  | WB |
| IAARAVELL | Env | 749 | C | 0.24898 | 0.846 | 0.509625 | 0.811 | 201.49 |  | WB |
| QMHEDIISL | Env | 102 | C | 0.226914 | 0.927 | 0.402093 | 1.719 | 644.98 |  | WB |
| FDPIPIHY | Env | 198 | C | 0.215602 | 0.975 | 0.167134 | 9.491 | 8196.2 |  | WB |
| YAILKCNNKTF | Env | 211 | C | 0.203654 | 1.033 | 0.536423 | 0.676 | 150.78 |  | WB |
| LVQYWGLEL | Env | 778 | C | 0.195315 | 1.08 | 0.552698 | 0.605 | 126.43 |  | WB |
| LIAARAVEL | Env | 748 | C | 0.192955 | 1.093 | 0.475596 | 1.035 | 291.18 |  | WB |
| YCAPAGYAI | Env | 205 | C | 0.190789 | 1.105 | 0.509632 | 0.811 | 201.48 |  | WB |
| KVSFDPIPIHY | Env | 195 | C | 0.174861 | 1.209 | 0.21699 | 6.32 | 4779.04 |  | WB |
| KSNITGLLL | Env | 420 | C | 0.148587 | 1.404 | 0.420552 | 1.522 | 528.21 |  | WB |
| YAPPIAGNI | Env | 409 | C | 0.145736 | 1.43 | 0.428847 | 1.432 | 482.87 |  | WB |
| FFYCNTSKL | Env | 368 | C | 0.13947 | 1.489 | 0.543822 | 0.644 | 139.18 |  | WB |
| YTDTIYRL | Env | 610 | C | 0.132907 | 1.55 | 0.242296 | 5.213 | 3634.36 |  | WB |
| LRAIEAQQHM | Env | 528 | C | 0.130522 | 1.572 | 0.447056 | 1.256 | 396.52 |  | WB |
| RIGPGQTF | Env | 296 | C | 0.127788 | 1.598 | 0.232341 | 5.613 | 4047.68 |  | WB |
| KYLGSLVQY | Env | 773 | C | 0.126143 | 1.615 | 0.208671 | 6.756 | 5229.15 |  | WB |
| IVLENVTENF | Env | 83 | C | 0.119627 | 1.684 | 0.371536 | 2.142 | 897.7 |  | WB |
| VSKKLKEHF | Env | 332 | C | 0.11672 | 1.719 | 0.21887 | 6.23 | 4682.81 |  | WB |
| ILKCNNKTF | Env | 213 | C | 0.107861 | 1.836 | 0.362187 | 2.283 | 993.26 |  | WB |
| FPNKTIKF | Env | 340 | C | 0.104282 | 1.884 | 0.185568 | 8.115 | 6714.16 |  | WB |
| MWQEVGRAM | Env | 400 | C | 0.103597 | 1.893 | 0.384677 | 1.945 | 778.73 |  | WB |
| STNSTITL | Env | 383 | C | 0.10245 | 1.909 | 0.23879 | 5.349 | 3774.88 |  | WB |
| YLGSLVQY | Env | 774 | C | 0.097504 | 1.978 | 0.237775 | 5.388 | 3816.56 |  | WB |
| SQVQHTNIM | Gag | 368 | A1 | 0.335296 | 0.611 | 0.540339 | 0.659 | 144.52 |  | WB |
| IVGGHQAAM | Gag | 190 | A1 | 0.332089 | 0.618 | 0.531842 | 0.696 | 158.44 |  | WB |
| RMYSPVSIL | Gag | 275 | A1 & C | 0.300269 | 0.688 | 0.568383 | 0.539 | 106.7 |  | WB |
| HQSLSPRTL | Gag | 144 | A1 | 0.27481 | 0.762 | 0.343764 | 2.572 | 1212.36 |  | WB |
| EQDPPLVSL | Gag | 479 | A1 | 0.265043 | 0.792 | 0.168239 | 9.399 | 8098.79 |  | WB |
| EVIPMFSAL | Gag | 167 | A1 | 0.230496 | 0.912 | 0.448962 | 1.237 | 388.43 |  | WB |
| KARVLAEAM | Gag | 359 | A1 & C | 0.22823 | 0.922 | 0.534478 | 0.685 | 153.98 |  | WB |
| SLYNTVATL | Gag | 77 | A1 & C | 0.227893 | 0.923 | 0.477865 | 1.02 | 284.12 |  | WB |
| SSKGRPGNF | Gag | 438 | A1 | 0.207597 | 1.012 | 0.332815 | 2.772 | 1364.84 |  | WB |
| WASRELERF | Gag | 36 | A1 & C | 0.196382 | 1.074 | 0.457215 | 1.165 | 355.25 |  | WB |
| HLVWASREL | Gag | 33 | A1 & C | 0.184639 | 1.145 | 0.46826 | 1.083 | 315.23 |  | WB |
| FSPEVIPM | Gag | 164 | A1 & C | 0.184534 | 1.146 | 0.511259 | 0.801 | 197.96 |  | WB |
| GATPQDLNM | Gag | 178 | A1 | 0.178777 | 1.183 | 0.354918 | 2.392 | 1074.54 |  | WB |
| LRALGPGATL | Gag | 334 | A1 & C | 0.176845 | 1.196 | 0.468908 | 1.079 | 313.03 |  | WB |
| KAFSPEVIPM | Gag | 162 | A1 & C | 0.162729 | 1.291 | 0.570562 | 0.529 | 104.21 |  | WB |
| LYNTVATLY | Gag | 78 | A1 & C | 0.158278 | 1.325 | 0.341834 | 2.607 | 1237.95 |  | WB |
| GTEELRSLY | Gag | 71 | A1 & C | 0.157273 | 1.333 | 0.290496 | 3.697 | 2157.44 |  | WB |
| KAFSPEVIPMF | Gag | 162 | A1 & C | 0.138827 | 1.495 | 0.325694 | 2.902 | 1474.16 |  | WB |
| IVQNAQGQM | Gag | 134 | A1 | 0.136572 | 1.516 | 0.386398 | 1.92 | 764.36 |  | WB |
| SSKVSQNY | Gag | 125 | A1 | 0.130482 | 1.572 | 0.205323 | 6.943 | 5422.05 |  | WB |
| ILRALGPGATL | Gag | 333 | A1 & C | 0.127028 | 1.605 | 0.327163 | 2.875 | 1450.91 |  | WB |
| HAGPIPPGQM | Gag | 219 | A1 | 0.119532 | 1.685 | 0.264835 | 4.449 | 2847.86 |  | WB |
| KVIEEKAF | Gag | 157 | A1 & C | 0.105035 | 1.874 | 0.190356 | 7.822 | 6375.19 |  | WB |
| AFSPEVIPM | Gag | 163 | A1 & C | 0.097858 | 1.973 | 0.318572 | 3.039 | 1592.24 |  | WB |
| RAEQATQEV | Gag | 305 | A1 | 0.097632 | 1.976 | 0.33118 | 2.802 | 1389.2 |  | WB |
| KAADGKVSQNY | Gag | 119 | C | 0.381886 | 0.506 | 0.328432 | 2.852 | 1431.13 |  | WB |
| FALNPGLL | Gag | 44 | C | 0.327012 | 0.629 | 0.500559 | 0.866 | 222.26 |  | WB |
| QANNTNIMM | Gag | 366 | C | 0.316923 | 0.651 | 0.534963 | 0.683 | 153.18 |  | WB |
| QAISPRTL | Gag | 142 | C | 0.301281 | 0.686 | 0.286115 | 3.814 | 2262.16 |  | WB |
| HQAISPRTL | Gag | 141 | C | 0.299385 | 0.69 | 0.376814 | 2.063 | 847.88 |  | WB |
| EVIPMFTAL | Gag | 164 | C | 0.268549 | 0.781 | 0.434537 | 1.374 | 454.04 |  | WB |
| AADGKVSQNY | Gag | 120 | C | 0.246056 | 0.856 | 0.269077 | 4.315 | 2720.1 |  | WB |
| TAPPAESF | Gag | 452 | C | 0.210741 | 0.996 | 0.249181 | 4.956 | 3373.46 |  | WB |
| TVGGHQAAM | Gag | 187 | C | 0.208381 | 1.007 | 0.434397 | 1.375 | 454.73 |  | WB |
| IIKQLQPAL | Gag | 60 | C | 0.177103 | 1.194 | 0.335437 | 2.724 | 1326.67 |  | WB |
| IAGTTSTL | Gag | 233 | C | 0.147722 | 1.412 | 0.319726 | 3.013 | 1572.49 |  | WB |
| SQANNTNIM | Gag | 365 | C | 0.139661 | 1.487 | 0.463489 | 1.117 | 331.93 |  | WB |
| IVQNLQGQM | Gag | 131 | C | 0.119719 | 1.683 | 0.353613 | 2.411 | 1089.82 |  | WB |
| ATPQDLNTM | Gag | 176 | C | 0.116598 | 1.721 | 0.283877 | 3.873 | 2317.61 |  | WB |
| MTSNPPIPV | Gag | 247 | C | 0.115201 | 1.739 | 0.549135 | 0.621 | 131.4 |  | WB |
| PTAPPAESF | Gag | 451 | C | 0.113002 | 1.768 | 0.21742 | 6.3 | 4756.86 |  | WB |
| WVYNTQGYF | Nef | 114 | A | 0.357859 | 0.56 | 0.68489 | 0.184 | 30.25 |  | WB |
| IALEMHPEFY | Nef | 195 | A | 0.339334 | 0.602 | 0.512904 | 0.793 | 194.47 |  | WB |
| QVPLRPMTF | Nef | 74 | A | 0.301437 | 0.686 | 0.316784 | 3.079 | 1623.35 |  | WB |
| YSQKRQEIL | Nef | 103 | A | 0.241465 | 0.872 | 0.446334 | 1.263 | 399.63 |  | WB |
| GAFDLSFFL | Nef | 84 | A | 0.228536 | 0.92 | 0.491318 | 0.925 | 245.63 |  | WB |
| HIALEMHPEF | Nef | 194 | A | 0.16498 | 1.275 | 0.460682 | 1.139 | 342.17 |  | WB |
| MTFKGAFDL | Nef | 80 | A | 0.143811 | 1.448 | 0.586978 | 0.459 | 87.25 |  | WB |
| WVYNTQGY | Nef | 114 | A | 0.133409 | 1.545 | 0.385191 | 1.938 | 774.41 |  | WB |
| FPVRPQVPL | Nef | 69 | A & C | 0.120275 | 1.677 | 0.441135 | 1.314 | 422.76 |  | WB |
| GAFDLSFF | Nef | 84 | A | 0.117278 | 1.712 | 0.318159 | 3.048 | 1599.38 |  | WB |
| AATQASCAW | Nef | 49 | A | 0.109135 | 1.82 | 0.431006 | 1.408 | 471.72 |  | WB |
| LARRHIAL | Nef | 190 | A | 0.09746 | 1.978 | 0.326682 | 2.884 | 1458.48 |  | WB |
| MARELHPEYY | Nef | 195 | C | 0.361584 | 0.552 | 0.590551 | 0.444 | 83.94 |  | WB |
| WVYHTQGYF | Nef | 114 | C | 0.28466 | 0.732 | 0.642211 | 0.277 | 48 |  | WB |
| AAFDLSFF | Nef | 84 | C | 0.28226 | 0.739 | 0.421807 | 1.51 | 521.09 |  | WB |
| HMARELHPEY | Nef | 194 | C | 0.26171 | 0.802 | 0.467187 | 1.09 | 318.91 |  | WB |
| YSKKRQEIL | Nef | 103 | C | 0.209644 | 1 | 0.380848 | 2.003 | 811.66 |  | WB |
| YKAAFDLSF | Nef | 82 | C | 0.199563 | 1.056 | 0.571632 | 0.525 | 103.01 |  | WB |
| KAAFDLSF | Nef | 83 | C | 0.176032 | 1.201 | 0.398621 | 1.764 | 669.67 |  | WB |
| WVYHTQGY | Nef | 114 | C | 0.164097 | 1.281 | 0.372584 | 2.127 | 887.58 |  | WB |
| VSSGIRKVL | Pol | 707 | A1 & C | 0.36556 | 0.543 | 0.451144 | 1.215 | 379.37 |  | WB |
| ESFRKYTAF | Pol | 277 | A1 | 0.3559 | 0.564 | 0.510061 | 0.809 | 200.54 |  | WB |
| MAVFIHNF | Pol | 893 | A1 & C | 0.312 | 0.662 | 0.497293 | 0.885 | 230.25 |  | WB |
| KTAVQMAVF | Pol | 888 | A1 & C | 0.286168 | 0.727 | 0.557407 | 0.585 | 120.15 |  | WB |
| SKNPEIIIY | Pol | 328 | A1 | 0.282558 | 0.738 | 0.27689 | 4.07 | 2499.61 |  | WB |
| LKDPVHGVY | Pol | 465 | A1 | 0.275662 | 0.759 | 0.371671 | 2.14 | 896.39 |  | WB |
| KIQNFRVYY | Pol | 934 | A1 & C | 0.26776 | 0.783 | 0.401027 | 1.733 | 652.46 |  | WB |
| QSQGVVESM | Pol | 861 | A1 & C | 0.252004 | 0.836 | 0.412605 | 1.601 | 575.64 |  | WB |
| FVNTPPLVKL | Pol | 571 | A1 & C | 0.239215 | 0.88 | 0.459389 | 1.149 | 346.99 |  | WB |
| KQITKIQNF | Pol | 930 | A1 | 0.224701 | 0.937 | 0.303688 | 3.371 | 1870.46 |  | WB |
| LTEEKIKAL | Pol | 181 | A1 & C | 0.224105 | 0.939 | 0.326478 | 2.887 | 1461.7 |  | WB |
| ILKDPVHGVY | Pol | 464 | A1 | 0.223912 | 0.94 | 0.352937 | 2.421 | 1097.82 |  | WB |
| FQSSMTKIL | Pol | 315 | A1 & C | 0.218146 | 0.964 | 0.504703 | 0.841 | 212.51 |  | WB |
| TAVQMAVF | Pol | 889 | A1 & C | 0.206477 | 1.018 | 0.431294 | 1.404 | 470.25 |  | WB |
| KLNWASQIY | Pol | 418 | A1 & C | 0.204547 | 1.028 | 0.449963 | 1.227 | 384.24 |  | WB |
| LGIPHPAGL | Pol | 247 | A1 & C | 0.200432 | 1.051 | 0.413018 | 1.597 | 573.07 |  | WB |
| QGTGPTFSF | Pol | 48 | A1 | 0.192154 | 1.097 | 0.329447 | 2.833 | 1415.49 |  | WB |
| VVMESIVIW | Pol | 530 | A1 | 0.19088 | 1.105 | 0.357055 | 2.36 | 1049.98 |  | WB |
| TKIQNFRVY | Pol | 933 | A1 | 0.188567 | 1.12 | 0.383669 | 1.96 | 787.26 |  | WB |
| ISKIGPENPY | Pol | 202 | A1 | 0.187844 | 1.124 | 0.489952 | 0.935 | 249.29 |  | WB |
| KLIGKDKVY | Pol | 679 | A1 | 0.1755 | 1.205 | 0.29419 | 3.599 | 2072.91 |  | WB |
| RAHLLSWGF | Pol | 361 | A1 | 0.174719 | 1.21 | 0.469707 | 1.074 | 310.34 |  | WB |
| LAFQQGEARKF | Pol | 6 | A1 | 0.164966 | 1.275 | 0.428127 | 1.44 | 486.65 |  | WB |
| WTVNDIQKL | Pol | 407 | A1 & C | 0.157896 | 1.328 | 0.43906 | 1.333 | 432.35 |  | WB |
| IATDIQTKEL | Pol | 919 | A1 & C | 0.157511 | 1.331 | 0.356511 | 2.368 | 1056.17 |  | WB |
| FVNTPPLVKLWY | Pol | 571 | A1 & C | 0.155907 | 1.344 | 0.422651 | 1.501 | 516.35 |  | WB |
| TQIGCTLNF | Pol | 147 | A1 | 0.152978 | 1.368 | 0.461041 | 1.136 | 340.84 |  | WB |
| LVNQIIEKL | Pol | 672 | A1 | 0.149606 | 1.395 | 0.287707 | 3.771 | 2223.53 |  | WB |
| YFSVPLDESF | Pol | 270 | A1 | 0.137998 | 1.502 | 0.467101 | 1.091 | 319.21 |  | WB |
| ATWIPEWEF | Pol | 563 | A1 & C | 0.13467 | 1.533 | 0.282179 | 3.918 | 2360.58 |  | WB |
| ATDIQTKEL | Pol | 920 | A1 & C | 0.133302 | 1.546 | 0.198066 | 7.368 | 5864.94 |  | WB |
| ITKIQNFRVY | Pol | 932 | A1 | 0.121022 | 1.67 | 0.477253 | 1.024 | 286 |  | WB |
| ETPGIRYQY | Pol | 293 | A1 & C | 0.116612 | 1.721 | 0.178555 | 8.582 | 7243.45 |  | WB |
| VVHTDNGSNF | Pol | 827 | A1 | 0.115483 | 1.736 | 0.324699 | 2.92 | 1490.11 |  | WB |
| RSKNPEIIIY | Pol | 327 | A1 | 0.115474 | 1.736 | 0.305731 | 3.325 | 1829.57 |  | WB |
| TAYFLLKL | Pol | 812 | A1 | 0.113739 | 1.759 | 0.277299 | 4.057 | 2488.57 |  | WB |
| FSVPLDESFRKY | Pol | 271 | A1 | 0.112764 | 1.772 | 0.457089 | 1.166 | 355.73 |  | WB |
| VYYDPSKDL | Pol | 472 | A1 & C | 0.112341 | 1.777 | 0.245583 | 5.086 | 3507.38 |  | WB |
| FPISPIETV | Pol | 155 | A1 & C | 0.112292 | 1.778 | 0.328478 | 2.851 | 1430.41 |  | WB |
| FFRENLAF | Pol | 1 | A1 & C | 0.109798 | 1.811 | 0.36058 | 2.307 | 1010.68 |  | WB |
| GGFIKVKQY | Pol | 107 | A1 | 0.109739 | 1.812 | 0.180556 | 8.441 | 7088.31 |  | WB |
| HTDNGSNF | Pol | 829 | A1 & C | 0.107207 | 1.845 | 0.230935 | 5.676 | 4109.73 |  | WB |
| VTVLDVGDAY | Pol | 261 | A1 & C | 0.106708 | 1.852 | 0.402489 | 1.714 | 642.22 |  | WB |
| ILKDPVHGVYY | Pol | 464 | A1 | 0.106233 | 1.858 | 0.203807 | 7.03 | 5511.72 |  | WB |
| SKIGPENPY | Pol | 203 | A1 | 0.104838 | 1.877 | 0.289602 | 3.721 | 2178.41 |  | WB |
| KMIGGIGGF | Pol | 101 | A1 & C | 0.104399 | 1.882 | 0.451857 | 1.208 | 376.45 |  | WB |
| IQNFRVYY | Pol | 935 | CnA1 | 0.103473 | 1.895 | 0.230427 | 5.699 | 4132.38 |  | WB |
| HQKEPPFLW | Pol | 376 | A1 & C | 0.102662 | 1.906 | 0.158378 | 10.229 | 9010.66 |  | WB |
| YALGIIQAQ | Pol | 656 | A1 & C | 0.101253 | 1.925 | 0.408886 | 1.642 | 599.28 |  | WB |
| TFSFPQITL | Pol | 53 | A1 | 0.097074 | 1.984 | 0.249974 | 4.93 | 3344.64 |  | WB |
| FPQGEAREF | Pol | 8 | C | 0.34726 | 0.584 | 0.406087 | 1.672 | 617.7 |  | WB |
| IKIQNFRVY | Pol | 929 | C | 0.21752 | 0.967 | 0.427914 | 1.442 | 487.77 |  | WB |
| LVNQIIEQL | Pol | 668 | C | 0.213079 | 0.986 | 0.343043 | 2.585 | 1221.86 |  | WB |
| YTAFTIPSI | Pol | 278 | C | 0.211829 | 0.991 | 0.620301 | 0.34 | 60.84 |  | WB |
| TAYYILKL | Pol | 808 | C | 0.205678 | 1.022 | 0.316606 | 3.083 | 1626.48 |  | WB |
| KALTDIVPL | Pol | 438 | C | 0.204854 | 1.027 | 0.546496 | 0.632 | 135.21 |  | WB |
| WAGIQQEF | Pol | 843 | C | 0.196719 | 1.072 | 0.356579 | 2.367 | 1055.4 |  | WB |
| RANSPTSREL | Pol | 22 | C | 0.185245 | 1.141 | 0.389929 | 1.873 | 735.71 |  | WB |
| FSVPLDEGFRKY | Pol | 267 | C | 0.16102 | 1.302 | 0.457413 | 1.164 | 354.49 |  | WB |
| TLNFPQITL | Pol | 49 | C | 0.159456 | 1.315 | 0.312476 | 3.175 | 1700.8 |  | WB |
| GGFIKVRQY | Pol | 103 | C | 0.1474 | 1.415 | 0.218402 | 6.253 | 4706.58 |  | WB |
| ILKEPVHGVY | Pol | 460 | C | 0.139875 | 1.485 | 0.314137 | 3.138 | 1670.51 |  | WB |
| QLIKKERVY | Pol | 675 | C | 0.133957 | 1.54 | 0.248639 | 4.973 | 3393.3 |  | WB |
| KQIIKIQNF | Pol | 926 | C | 0.131944 | 1.559 | 0.252557 | 4.846 | 3252.46 |  | WB |
| ITKIGPENPY | Pol | 198 | C | 0.1308 | 1.57 | 0.421384 | 1.514 | 523.48 |  | WB |
| RAMASEFNL | Pol | 731 | C | 0.121006 | 1.67 | 0.492241 | 0.919 | 243.19 |  | WB |
| LKEPVHGVY | Pol | 461 | C | 0.116511 | 1.722 | 0.312324 | 3.178 | 1703.61 |  | WB |
| FRAQNPEIVIY | Pol | 322 | C | 0.114352 | 1.75 | 0.276719 | 4.075 | 2504.24 |  | WB |
| RAQNPEIVI | Pol | 323 | C | 0.101652 | 1.92 | 0.337334 | 2.689 | 1299.71 |  | WB |
| VPLDEGFRKY | Pol | 269 | C | 0.100791 | 1.932 | 0.187678 | 7.98 | 6562.61 |  | WB |
| KAVRIIKIL | Rev | 14 | A1 | 0.153297 | 1.365 | 0.371364 | 2.145 | 899.38 |  | WB |
| RSAEPVPLQL | Rev | 66 | A1 | 0.142886 | 1.457 | 0.267964 | 4.35 | 2753.06 |  | WB |
| AVRIIKILY | Rev | 15 | A1 & C | 0.101483 | 1.922 | 0.204064 | 7.014 | 5496.41 |  | WB |
| LQLPPIERL | Rev | 73 | C | 0.14727 | 1.416 | 0.226179 | 5.889 | 4326.75 |  | WB |
| QAVRIIKIL | Rev | 14 | C | 0.132609 | 1.553 | 0.334777 | 2.736 | 1336.17 |  | WB |
| RPAEPVPLQL | Rev | 66 | C | 0.108441 | 1.829 | 0.204054 | 7.015 | 5497.01 |  | WB |
| FLNKGLGISY | Tat | 38 | A1 | 0.229185 | 0.918 | 0.45994 | 1.144 | 344.93 |  | WB |
| LNKGLGISY | Tat | 39 | A1 | 0.150828 | 1.385 | 0.288096 | 3.761 | 2214.19 |  | WB |
| FQTKGLGISY | Tat | 38 | C | 0.331945 | 0.618 | 0.50803 | 0.821 | 205 |  | WB |
| NSLVKHHMY | Vif | 22 | A1 & C | 0.315654 | 0.654 | 0.380199 | 2.012 | 817.38 |  | WB |
| DARLVVRTY | Vif | 61 | A1 | 0.239778 | 0.878 | 0.29818 | 3.494 | 1985.32 |  | WB |
| LADQLIHLHY | Vif | 102 | A1 | 0.211333 | 0.993 | 0.422226 | 1.505 | 518.73 |  | WB |
| VVSPRCEY | Vif | 128 | A1 | 0.205318 | 1.024 | 0.294344 | 3.595 | 2069.46 |  | WB |
| KTKPPLPSV | Vif | 158 | A1 | 0.195951 | 1.076 | 0.267004 | 4.381 | 2781.8 |  | WB |
| LADQLIHLH | Vif | 102 | A1 | 0.183138 | 1.155 | 0.301829 | 3.412 | 1908.47 |  | WB |
| YSTQIDPDL | Vif | 94 | A1 | 0.12009 | 1.679 | 0.465731 | 1.1 | 323.98 |  | WB |
| HNKVGSLQY | Vif | 139 | A1 & C | 0.115281 | 1.738 | 0.240839 | 5.269 | 3692.11 |  | WB |
| LGHGVSIEW | Vif | 81 | A1 & C | 0.110124 | 1.806 | 0.295045 | 3.576 | 2053.82 |  | WB |
| LQYLALKAL | Vif | 145 | A1 | 0.108206 | 1.832 | 0.431922 | 1.398 | 467.07 |  | WB |
| KAILGHIVI | Vif | 122 | C | 0.227424 | 0.925 | 0.511344 | 0.801 | 197.78 |  | WB |
| LADQLIHMHY | Vif | 102 | C | 0.210579 | 0.996 | 0.442515 | 1.301 | 416.49 |  | WB |
| FADSAIRKA | Vif | 115 | C | 0.174186 | 1.213 | 0.39092 | 1.861 | 727.86 |  | WB |
| YSTQVDPGL | Vif | 94 | C | 0.171802 | 1.23 | 0.506153 | 0.832 | 209.21 |  | WB |
| DARLVIKTY | Vif | 61 | C | 0.168372 | 1.253 | 0.238014 | 5.379 | 3806.71 |  | WB |
| LADQLIHMH | Vif | 102 | C | 0.164259 | 1.28 | 0.281472 | 3.937 | 2378.71 |  | WB |
| LQYLALTAL | Vif | 145 | C | 0.158573 | 1.322 | 0.511877 | 0.798 | 196.64 |  | WB |
| KIKPPLPSV | Vif | 158 | C | 0.142395 | 1.461 | 0.222732 | 6.046 | 4491.16 |  | WB |
| LADQLIHM | Vif | 102 | C | 0.134856 | 1.532 | 0.265169 | 4.438 | 2837.58 |  | WB |
| HIVIPRCDY | Vif | 127 | C | 0.099586 | 1.949 | 0.365113 | 2.239 | 962.31 |  | WB |
| RANGWFYRHHY | Vif | 34 | C | 0.097793 | 1.973 | 0.331941 | 2.788 | 1377.81 |  | WB |
| LGQHIYNTY | Vpr | 42 | A | 0.243689 | 0.864 | 0.424712 | 1.478 | 504.96 |  | WB |
| FPRPWLHGL | Vpr | 34 | A | 0.182312 | 1.16 | 0.338313 | 2.671 | 1286.02 |  | WB |
| AIIRTLQQL | Vpr | 59 | A | 0.117168 | 1.713 | 0.283589 | 3.881 | 2324.84 |  | WB |
| HSLGQYIY | Vpr | 40 | C | 0.11724 | 1.712 | 0.270843 | 4.26 | 2668.62 |  | WB |
| WTLELLEEL | Vpr | 18 | C | 0.106043 | 1.861 | 0.445803 | 1.269 | 401.93 |  | WB |
| LGQYIYETY | Vpr | 42 | C | 0.103312 | 1.897 | 0.400359 | 1.742 | 657.2 |  | WB |
| WTIVGIEY | Vpu | 23 | A | 0.196678 | 1.072 | 0.360771 | 2.304 | 1008.6 |  | WB |
| YAIVALVVAF | Vpu | 7 | A | 0.183715 | 1.151 | 0.660056 | 0.234 | 39.57 |  | WB |
| AIVALVVAF | Vpu | 8 | A | 0.131763 | 1.561 | 0.356484 | 2.368 | 1056.48 |  | WB |
| IVALVVAF | Vpu | 9 | A | 0.125815 | 1.618 | 0.274184 | 4.155 | 2573.88 |  | WB |
| YAIVALVV | Vpu | 7 | A | 0.105075 | 1.873 | 0.438317 | 1.34 | 435.84 |  | WB |
| MVDMGHLRL | Vpu | 72 | C | 0.319918 | 0.645 | 0.497757 | 0.883 | 229.1 |  | WB |
| AIVVWTIVY | Vpu | 24 | C | 0.17373 | 1.217 | 0.378767 | 2.034 | 830.15 |  | WB |
| IVYIEYRKL | Vpu | 30 | C | 0.168865 | 1.249 | 0.345592 | 2.539 | 1188.62 |  | WB |
| IVVWTIVY | Vpu | 25 | C | 0.136583 | 1.516 | 0.3267 | 2.883 | 1458.2 |  | WB |
| IAIVVWTIVY | Vpu | 23 | C | 0.125981 | 1.617 | 0.542971 | 0.648 | 140.46 |  | WB |
| YTPGPGTRFPLTF | Nef | 128 | A | f 0.097320 | 0 1.98 | 0 0.35952 | 8 2.32 | 3 1022.25 |  | WB |

**Table S2. Stereochemical and spatial analysis of the HLA-C*03:02 model by different computational tools**

| **Spatial analysis** | | **Steriochemical analysis** | | | | | | | **Overall** |
| --- | --- | --- | --- | --- | --- | --- | --- | --- | --- |
| Verify 3D | ProSA | ERRAT | PROVE | Pro-Check | | | ProQ | RAMPAGE | ProTSAV |
| E | W | P |
| 99.63 | -9.08 | 94.667 | 1.8 | 1 | 6 | 2 | 8.708 | 99.578 | ~0.525 |

**Table S3. Hydrogen bond occupancy of C*03:02 residues making contact with peptides**

| **Amino Acid Residue** | **Peptide** | | | |
| --- | --- | --- | --- | --- |
| **GY971** | **AY9324** | **GF1043** | **VL9109** |
| Y8 | 0.00% | 88.73% | 0.00% | 0.00% |
| E62-1 | 88.79% | 94.43% | 87.10% | 64.06% |
| E62-2 | 84.76% | 92.40% | 0.00% | 0.00% |
| E62-3 | 0.00% | 91.09% | 0.00% | 0.00% |
| K65 | 61.87% | 69.68% | 91.77% | 0.00% |
| R68 | 54.58% | 0.00% | 0.00% | 0.00% |
| Y83 | 74.37% | 0.00% | 80.85% | 0.00% |
| R96 | 0.00% | 0.00% | 0.00% | 73.74% |
| Y98 | 0.00% | 84.12% | 0.00% | 0.00% |
| N113 | 91.48% | 0.00% | 0.00% | 0.00% |
| T142 | 67.90% | 66.70% | 59.10% | 94.36% |
| K145-1 | 67.35% | 56.30% | 58.07% | 50.00% |
| K145-2 | 54.80% | 52.26% | 0.00% | 0.00% |
| W146-1 | 93.04% | 73.91% | 73.25% | 0.00% |
| W146-2 | 65.79% | 0.00% | 0.00% | 0.00% |
| E151-1 | 95.74% | 0.00% | 53.94% | 59.68% |
| E151-2 | 92.87% | 0.00% | 0.00% | 0.00% |
| E151-3 | 80.76% | 0.00% | 0.00% | 0.00% |
| Y158 | 0.00% | 61.57% | 0.00% | 0.00% |

**Table S4. Calculated MM-PBSA binding energy difference**

| **Amino acid mutation** | **Binding Free Energy Difference** | | | |
| --- | --- | --- | --- | --- |
| **GY971** | **AY9324** | **GF1043** | **VL9109** |
| E62A | -25.54 | -47.47 | -11.91 | -9.25 |
| E151A | -23.4 | 3.93 | -6.47 | -1.98 |
| T142A | -12.97 | -9.94 | -8.77 | -9.91 |
| N113A | -11.49 | 2 | -2.64 | -9.27 |
| K145A | -10.8 | -1.54 | -6.9 | -7.65 |
| S115A | -10.66 | -0.09 | -2.63 | 0.8 |
| W146A | -8.55 | -4.03 | -5.13 | -5.51 |
| Y83A | -7.98 | -0.16 | -4.84 | 0.07 |
| R68A | -6.36 | -0.49 | -0.06 | -15.49 |
| K65A | -6.2 | -2.05 | -5.08 | -6.33 |
| N79A | -3.12 | 1.37 | -0.57 | 1.43 |
| S76A | -2.57 | 1.03 | -1.35 | 0.62 |
| L155A | -2.11 | 1.62 | 0.21 | 3.28 |
| R96A | -1.78 | 0.73 | 1.68 | -32.25 |
| L80A | -1.64 | 0.33 | -1.62 | 0.17 |
| I123A | 0.53 | -0.91 | -1.62 | 0.16 |
| Y158A | 0.43 | -3.51 | -1.59 | -5.99 |
| Y122A | -1.44 | -0.87 | -1.13 | -1.16 |
| V75A | -0.11 | 0.14 | -0.65 | 0.25 |
| Y98A | 2.53 | -0.13 | -0.38 | 0.48 |
| R61A | -0.41 | 0.01 | -0.26 | 0.23 |
| F32A | -0.22 | -0.05 | -0.14 | -0.53 |
| Y8A | 4.19 | 4.21 | -0.13 | -5.36 |
| L94A | 1.22 | -0.16 | -0.13 | 3.05 |
| M4A | -0.49 | -0.35 | -0.1 | -0.56 |
| Y170A | 2.91 | 0.75 | -0.06 | 0.94 |
| Q154A | 0.02 | 0.3 | -0.04 | 0.16 |
| Q95A | 0.03 | -0.05 | -0.01 | 0.03 |
| Y58A | 2.81 | 0.74 | 0.11 | -1.04 |
| I141A | 0.31 | 0.12 | 0.3 | 0.3 |
| T72A | -1.45 | -0.37 | 0.56 | -1.4 |
| Y6A | 1.7 | -0.82 | 0.64 | -2.69 |
| W166A | 1.21 | 2.39 | 1.16 | 0.8 |
| Y66A | 2.93 | 0.53 | 1.25 | -3.58 |
| Q69A | 0.73 | 3.13 | 1.53 | 0.78 |
| All values are given in kcal/mol | | | | |

**Table S5. Participant characteristics and IFN-γ response**

| **No.** | **Age (Yrs)** | **Sex** | **ART Duration (Mo)** | **Progression status** | **HLA locus** | | | | | | **IFN-γ response (SFU/106 cells)** | **HIV-1 Clade** |
| --- | --- | --- | --- | --- | --- | --- | --- | --- | --- | --- | --- | --- |
| **A** | | **B** | | **C** | |
| **HLA-C*03:02 positive** | | |  |  |  | |  | |  | |  |  |
| P1 | 2.3 | Female | 18 | RP | A*31:01 | A*23:01 | B*82:02 | B*08:01 | C*07:01 | C*03:02 | 10 | D |
| P2 | 13.9 | Male | 30 | LTNP | ND | ND | B*81:01 | B*45:01 | C*03:02 | C*18:01 | 940 | A1 |
| P3 | 20.8 | Female | 35 | LTNP | A*30:01 | A*02:01 | B*42:01 | B*58:01 | C*03:02 | C*17:01 | 65 | C |
| P4 | 15.5 | Male | 4 | LTNP | A*74:01 | A*74:01 | B*35:01 | B*58:01 | C*04:01 | C*03:02 | 0 | No DNA |
| P5 | 14.3 | Male | 45 | LTNP | A*30:02 | A*31:04 | B*15:64 | B*58:01 | C*07:01 | C*03:02 | 5 | A1 |
| P6 | 12.0 | Female | 1 | LTNP | A*03:01 | A*68:02 | B*82:02 | B*45:01 | C*16:01 | C*03:02 |  | No DNA |
| P7 | 6.4 | Female | 68 | RP | A*02:02 | A*02:01 | B*58:01 | B*49:01 | C*07:01 | C*03:02 | 15 | A1D |
| P8 | 3.0 | Female | 15 | RP | A*74:01 | A*30:02 | B*58:01 | B*45:01 | C*06:02 | C*03:02 | 0 | A1D |
| P9 | 2.5 | Female | 8 | RP | A*74:01 | A*23:01 | B*07:02 | B*58:01 | C*07:02 | C*03:02 | 385 | A1 |
| P10 | 9.6 | Male | 104 | RP | A*30:01 | A*74:01 | B*82:02 | B*57:03 | C*03:02 | C*07:01 | 0 | A1 |
| P11 | 14.1 | Female | 26 | LTNP | A*30:02 | A*23:01 | B*45:01 | B*58:01 | C*03:02 | C*06:02 | 5 | A1 |
| P12 | 14.3 | Female | 35 | LTNP | A*30:02 | A*29:02 | B*39:10 | B*82:02 | C*12:03 | C*03:02 | 10 | D |
| P13 | 11.3 | Male | 2 | LTNP | A*74:01 | A*23:01 | B*07:02 | B*58:01 | C*07:02 | C*03:02 | 15 | No DNA |
| **HLA-C*03:02 negative** | | |  |  |  |  |  |  |  |  |  |  |
| C1 | 12.5 | Female | 121 | RP | A*29:02 | A*23:01 | B*42:01 | B*45:01 | C*06:30 | C*17:11 | 0 |  |
| C2 | 11.5 | Female | 1 | LTNP | A*26:12 | A*02:05 | B*58:02 | B*57:03 | C*07:01 | C*06:02 | 5 |  |
| C3 | 13.6 | Female | 1 | LTNP | A*03:01 | A*68:02 | B*15:10 | B*15:03 | C*02:27 | C*03:07 | 5 |  |
| C4 | 18.6 | Female | 8 | LTNP | A*74:01 | A*02:01 | B*53:01 | B*44:15 | C*04:01 | C*04:07 | 0 |  |
| C5 | 3.2 | Male | 35 | RP | A*66:01 | A*29:02 | B*42:01 | B*58:02 | C*06:30 | C*17:11 | 0 |  |
| C6 | 17.5 | Female | 1 | LTNP | A*34:02 | A*30:01 | B*42:01 | B*47:03 | C*17:01 | C*07:01 | 0 |  |
| C7 | 12.9 | Male | 1 | LTNP | A*68:02 | A*32:01 | B*81:01 | B*15:10 | C*03:04 | C*08:04 | 5 |  |
| C8 | 10.9 | Female | 1 | LTNP | A*74:01 | A*23:01 | B*15:03 | B*15:03 | C*02:10 | C*02:10 | 5 |  |
| C9 | 10.6 | Male | 101 | RP | A*30:02 | A*26:12 | B*15:03 | B*57:02 | C*02:10 | C*18:01 | 15 |  |
| C10 | 6.3 | Male | 59 | RP | A*30:02 | A*68:02 | B*42:01 | B*49:01 | C*17:01 | C*07:01 | 15 |  |
| C11 | 16.4 | Male | 1 | LTNP | A*29:02 | A*02:10 | B*15:16 | B*45:01 | C*14:02 | C*06:02 | 20 |  |
| C12 | 6.7 | Male | 53 | RP | A*34:02 | A*68:01 | B*35:71 | B*44:37 | C*07:01 | C*07:05 | 5 |  |
| Abbreviations: ND, not detected; SFU, spot forming units | | | | | | | | | | | | |
